# Supplementary material for: Spatiotemporal Patterns of Menin Localization in Developing Murine Brain: Co-Expression with the Elements of Cholinergic Synaptic Machinery
Source: MDPI journal article supplement (doi:10.3390/cells10051215), 2021-05-16
Supplement: s1 [file s1]

**Supplementary Table S1.** SP8 Leica (confocal) and Olympus VS120 fluorescent microscope settings. (Hotchkiss Brain Institute Advanced Microscopy Platform: HBIAMP, University of Calgary, AB, Canada.

| Fluorescent microscope settings for data presented in:                                  | SP8 Leica LIA - Laser Wavelength   | Laser Power   |
|-----------------------------------------------------------------------------------------|------------------------------------|---------------|
| Figure 1A, C<br>Figure 2A<br>Figure 3A<br>Figure 4A<br>Figure 6<br>Figure 7<br>Figure 8 | 402.7                              | 2.5           |
|                                                                                         | 568.1                              | 5.3           |
|                                                                                         | 680.0                              | 4.5           |
|                                                                                         |                                    |               |
| Figure 1B<br>Figure 4B<br>Figure 5                                                      | 402.7                              | 2.5           |
|                                                                                         | 568.1                              | 4.2           |
|                                                                                         | 680.0                              | 4             |
| Fluorescent microscope settings for data presented in:                                  | Olympus VS120 fluorescence filters | Exposure time |
| Figure 1–8                                                                              | TRITC                              | 100ms         |
|                                                                                         | DAPI                               | 50ms          |
|                                                                                         | TRITC                              | 100ms         |
|                                                                                         | Cy5                                | 75ms          |

**Supplementary Table S2.** Related to Figure 1D. Temporal Statistical analysis of qPCR analysis of Multiple endocrine neoplasia type 1, *MEN1* gene in E16, E18, P10 and Adult mouse whole brain slices.

| Ages          | Mean Diff. | 95.00% CI of diff.       | Significant? | Summary | Adjusted <i>p</i> Value |
|---------------|------------|--------------------------|--------------|---------|-------------------------|
| E16 vs. E18   | -0.0003063 | -0.0006463 to 3.368e-005 | No           | ns      | 0.0657                  |
| E16 vs. P10   | -0.005047  | -0.01388 to 0.003786     | No           | ns      | 0.1929                  |
| E16 vs. Adult | -1.911     | -3.015 to -0.8080        | Yes          | *       | 0.0109                  |
| E18 vs. P10   | -0.004741  | -0.01385 to 0.004369     | No           | ns      | 0.2337                  |
| E18 vs. Adult | -1.911     | -3.014 to -0.8078        | Yes          | *       | 0.0109                  |
| P10 vs. Adult | -1.906     | -3.016 to -0.7971        | Yes          | *       | 0.0111                  |

One-way ANOVA followed by Post-hoc-Tukey's multiple comparison test; n = 6, 3 independent experiments each, triplicate replicates; \*  $p < 0.01$ , ns  $\geq 0.05$

**Supplementary Table S3.** Related to Figure 3. Mean comparison of degree of colocalization of NFL with menin between different aged mouse brain (temporal).

|                           | E16               | E18               | P10               | Adult             |
|---------------------------|-------------------|-------------------|-------------------|-------------------|
| t, df                     | t = 7.821, df = 9 | t = 8.162, df = 9 | t = 12.88, df = 9 | t = 9.362, df = 9 |
| P value (two tailed)      | <0.0001           | <0.0001           | <0.0001           | <0.0001           |
| P value summary           | ****              | ****              | ****              | ****              |
| Significant (alpha=0.05)? | Yes               | Yes               | Yes               | Yes               |

One sample t-test; n refers to the analysis of NFL and menin D.O.C. between different ages of mouse brain, ROIs derived from 14 separate images from 13 independent experiments; \*\*\*\*  $p < 0.0001$

**Supplementary Table S4.** Related to Figure 4. Mean comparison of degree of colocalization of astrocytes with menin between different aged mouse brain (temporal).

| One sample t test         | E16               | E18               | P10             | Adult              |
|---------------------------|-------------------|-------------------|-----------------|--------------------|
| t, df                     | t = 13.07, df = 9 | t = 12.37, df = 9 | t = 4.152, df=9 | t = 0.9990, df = 9 |
| P value (two tailed)      | <0.0001           | <0.0001           | 0.0025          | 0.3439             |
| P value summary           | ****              | ****              | **              | ns                 |
| Significant (alpha=0.05)? | Yes               | Yes               | Yes             | No                 |

One sample t-test; *n* refers to the analysis of astrocytes and menin D.O.C. between different ages of mouse brain, ROIs derived from 14 separate images from 13 independent experiments; \*\*  $p < 0.01$ , \*\*\*\*  $p < 0.0001$ , ns  $\geq 0.05$

**Supplementary Table S5.** Related to Figure 5. Statistical analysis of IHC fluorescence of menin in different aged (temporal) mouse brain slices.

| Tukey's mc test | Mean Diff. | 95.00% CI of diff. | Significant? | Summary | Adjusted <i>p</i> Value |
|-----------------|------------|--------------------|--------------|---------|-------------------------|
| E12.5 vs. E15   | -12.77     | -15.95 to -9.601   | Yes          | ****    | <0.0001                 |
| E12.5 vs. E18   | -20.49     | -23.66 to -17.32   | Yes          | ****    | <0.0001                 |
| E12.5 vs. P10   | -22.82     | -25.99 to -19.65   | Yes          | ****    | <0.0001                 |
| E12.5 vs. Adult | -26.92     | -30.09 to -23.74   | Yes          | ****    | <0.0001                 |
| E15 vs. E18     | -7.714     | -10.89 to -4.541   | Yes          | ****    | <0.0001                 |
| E15 vs. P10     | -10.05     | -13.22 to -6.875   | Yes          | ****    | <0.0001                 |
| E15 vs. Adult   | -14.14     | -17.32 to -10.97   | Yes          | ****    | <0.0001                 |
| E18 vs. P10     | -2.333     | -5.506 to 0.8396   | No           | ns      | 0.2329                  |
| E18 vs. Adult   | -6.429     | -9.602 to -3.256   | Yes          | ****    | <0.0001                 |
| P10 vs. Adult   | -4.095     | -7.268 to -0.9223  | Yes          | **      | 0.0064                  |

One-way ANOVA followed by Post-hoc-Tukey's multiple comparison test; *n* refers to the analysis of menin C-terminal epitope fluorescence intensity within whole brain slices, ROIs derived from  $\geq 13$  separate images from 7 independent experiments in all age groups; \*\*  $p < 0.01$ , \*\*\*\*  $p < 0.0001$ , ns  $\geq 0.05$

**Supplementary Table S6a.** Related to Figure 6. Statistical analysis of IHC fluorescence of menin in E12.5 mouse whole brain slices.

| Regions   | Mean Diff. | 95.00% CI of diff. | Significant? | Summary | Adjusted <i>p</i> Value |
|-----------|------------|--------------------|--------------|---------|-------------------------|
| Di vs. Te | 2.659      | 0.4649 to 4.854    | Yes          | *       | 0.0122                  |
| Di vs. Mt | 5.792      | 3.598 to 7.986     | Yes          | ****    | <0.0001                 |
| Di vs. Ms | 13.14      | 10.89 to 15.39     | Yes          | ****    | <0.0001                 |
| Te vs. Mt | 3.133      | 0.9383 to 5.327    | Yes          | **      | 0.0025                  |
| Te vs. Ms | 10.48      | 8.232 to 12.73     | Yes          | ****    | <0.0001                 |
| Mt vs. Ms | 7.348      | 5.099 to 9.596     | Yes          | ****    | <0.0001                 |

One-way ANOVA followed by Post-hoc-Tukey's multiple comparison test; *n* refers to the analysis of menin C-terminal epitope fluorescence intensity within whole brain slices, ROIs derived from 13 separate images from 7 independent experiments; \*  $p < 0.01$ , \*\*  $p < 0.01$ , \*\*\*\*  $p < 0.0001$

**Supplementary Table S6b.** Related to Figure 6. IHC fluorescence of menin in E12.5 mouse brain slices.

| Fluorescence Intensity | Di     | Te     | Mt     | Ms     |
|------------------------|--------|--------|--------|--------|
| Mean                   | 18.38  | 15.72  | 12.59  | 5.239  |
| Std. Error of Mean     | 0.5899 | 0.7397 | 0.4685 | 0.4811 |

**Supplementary Table S7a.** Related to Figure 6. Statistical analysis of IHC fluorescence of menin in E15.5 mouse whole brain slices.

| Regions   | Mean Diff. | 95.00% CI of diff. | Significant? | Summary | Adjusted <i>p</i> Value |
|-----------|------------|--------------------|--------------|---------|-------------------------|
| Di vs. Te | -3.772     | -6.069 to -1.474   | Yes          | ***     | 0.0004                  |
| Di vs. Mt | 4.744      | 2.447 to 7.041     | Yes          | ****    | <0.0001                 |
| Di vs. Ms | 13.58      | 11.23 to 15.94     | Yes          | ****    | <0.0001                 |
| Te vs. Mt | 8.515      | 6.218 to 10.81     | Yes          | ****    | <0.0001                 |
| Te vs. Ms | 17.35      | 15.00 to 19.71     | Yes          | ****    | <0.0001                 |
| Mt vs. Ms | 8.839      | 6.485 to 11.19     | Yes          | ****    | <0.0001                 |

One-way ANOVA followed by Post-hoc-Tukey's multiple comparison test; *n* refers to the analysis of menin C-terminal epitope fluorescence intensity within whole brain slices, ROIs derived from 13 separate images from 7 independent experiments; \*\*\* *p* < 0.001, \*\*\*\* *p* < 0.0001

**Supplementary Table S7b.** Related to Figure 6. IHC fluorescence of menin in E15.5 mouse brain slices.

| Fluorescence Intensity | Di     | Te     | Mt     | Ms     |
|------------------------|--------|--------|--------|--------|
| Mean                   | 20.34  | 24.11  | 15.59  | 6.755  |
| Std. Error of Mean     | 0.3336 | 0.7853 | 0.6802 | 0.5397 |

**Supplementary Table S8a.** Related to Figure 6. Statistical analysis of IHC fluorescence of menin in E18 mouse whole brain slices.

| Regions   | Mean Diff. | 95.00% CI of diff. | Significant? | Summary | Adjusted <i>p</i> Value |
|-----------|------------|--------------------|--------------|---------|-------------------------|
| Co vs. Hc | -3.639     | -6.783 to -0.4954  | Yes          | *       | 0.0157                  |
| Co vs. Th | -8         | -11.14 to -4.857   | Yes          | ****    | <0.0001                 |
| Co vs. Ce | 4.282      | 1.139 to 7.426     | Yes          | **      | 0.0029                  |
| Co vs. Ht | 6.779      | 3.555 to 10.00     | Yes          | ****    | <0.0001                 |
| Hc vs. Th | -4.361     | -7.573 to -1.150   | Yes          | **      | 0.003                   |
| Hc vs. Ce | 7.921      | 4.710 to 11.13     | Yes          | ****    | <0.0001                 |
| Hc vs. Ht | 10.42      | 7.128 to 13.71     | Yes          | ****    | <0.0001                 |
| Th vs. Ce | 12.28      | 9.071 to 15.49     | Yes          | ****    | <0.0001                 |
| Th vs. Ht | 14.78      | 11.49 to 18.07     | Yes          | ****    | <0.0001                 |
| Ce vs. Ht | 2.497      | -0.7937 to 5.788   | No           | ns      | 0.2168                  |

One-way ANOVA followed by Post-hoc-Tukey's multiple comparison test; *n* refers to the analysis of menin C-terminal epitope fluorescence intensity within whole brain slices, ROIs derived from 13 separate images from 7 independent experiments; \* *p* < 0.1, \*\* *p* < 0.01, \*\*\*\* *p* < 0.0001, ns ≥ 0.05

**Supplementary Table S8b.** Related to Figure 6. IHC fluorescence of menin in E18 mouse brain slices.

| Fluorescence Intensity | Co     | Hc    | Th     | Ce     | Ht     |
|------------------------|--------|-------|--------|--------|--------|
| Mean                   | 26.53  | 30.17 | 34.53  | 22.25  | 19.75  |
| Std. Error of Mean     | 0.5477 | 0.703 | 0.8735 | 0.9065 | 0.9766 |

**Supplementary Table S9a.** Related to Figure 6. Statistical analysis of IHC fluorescence of menin in P10 mouse whole brain slices.

| Regions   | Mean Diff. | 95.00% CI of diff. | Significant? | Summary | Adjusted <i>p</i> Value |
|-----------|------------|--------------------|--------------|---------|-------------------------|
| Co vs. Hc | -4.338     | -8.326 to -0.3490  | Yes          | *       | 0.0268                  |
| Co vs. Th | -9.537     | -13.53 to -5.548   | Yes          | ****    | <0.0001                 |
| Co vs. Ce | 2.382      | -1.607 to 6.371    | No           | ns      | 0.4493                  |
| Co vs. Ht | 5.35       | 1.259 to 9.442     | Yes          | **      | 0.0047                  |
| Hc vs. Th | -5.199     | -9.274 to -1.125   | Yes          | **      | 0.0061                  |
| Hc vs. Ce | 6.72       | 2.645 to 10.79     | Yes          | ***     | 0.0002                  |
| Hc vs. Ht | 9.688      | 5.513 to 13.86     | Yes          | ****    | <0.0001                 |

|           |       |                 |     |      |         |
|-----------|-------|-----------------|-----|------|---------|
| Th vs. Ce | 11.92 | 7.844 to 15.99  | Yes | **** | <0.0001 |
| Th vs. Ht | 14.89 | 10.71 to 19.06  | Yes | **** | <0.0001 |
| Ce vs. Ht | 2.968 | -1.207 to 7.143 | No  | ns   | 0.2754  |

One-way ANOVA followed by Post-hoc-Tukey's multiple comparison test; *n* refers to the analysis of menin C-terminal epitope fluorescence intensity within whole brain slices, ROIs derived from 13 separate images from 7 independent experiments; \*  $p < 0.1$ , \*\*  $p < 0.01$ , \*\*\*  $p < 0.001$ , \*\*\*\*  $p < 0.0001$ , ns  $\geq 0.05$

**Supplementary Table S9b.** Related to Figure 6. IHC fluorescence of menin in P10 mouse brain slices.

| Fluorescence Intensity | Co    | Hc    | Th     | Ce     | Ht     |
|------------------------|-------|-------|--------|--------|--------|
| Mean                   | 27.75 | 32.09 | 37.29  | 25.37  | 22.4   |
| Std. Error of Mean     | 1.238 | 1.43  | 0.6834 | 0.8068 | 0.4705 |

**Supplementary Table S10a.** Related to Figure 6. Statistical analysis of IHC fluorescence of menin in Adult mouse whole brain slices.

| Regions                        | Mean Diff. | 95.00% CI of diff. | Significant? | Summary | Adjusted $p$ Value |
|--------------------------------|------------|--------------------|--------------|---------|--------------------|
| Cortex vs. Hippocampus         | -15.60     | -18.68 to -12.52   | Yes          | ****    | <0.0001            |
| Cortex vs. Thalamus            | -24.29     | -27.37 to -21.21   | Yes          | ****    | <0.0001            |
| Cortex vs. Cerebellum          | 6.489      | 3.410 to 9.569     | Yes          | ****    | <0.0001            |
| Cortex vs. Hypothalamus        | 8.561      | 5.403 to 11.72     | Yes          | ****    | <0.0001            |
| Cortex vs. Pons                | 17.94      | 14.78 to 21.10     | Yes          | ****    | <0.0001            |
| Cortex vs. medulla             | 19.15      | 15.99 to 22.31     | Yes          | ****    | <0.0001            |
| Cortex vs. midbrain            | 13.57      | 10.42 to 16.73     | Yes          | ****    | <0.0001            |
| Cortex vs. olfactory bulb      | 15.19      | 12.03 to 18.34     | Yes          | ****    | <0.0001            |
| Cortex vs. caudate putamen     | 17.06      | 13.91 to 20.22     | Yes          | ****    | <0.0001            |
| Cortex vs. basal forebrain     | 14.16      | 11.00 to 17.32     | Yes          | ****    | <0.0001            |
| Cortex vs. ventral striatum    | 12.11      | 8.948 to 15.26     | Yes          | ****    | <0.0001            |
| Hippocampus vs. Thalamus       | -8.690     | -11.84 to -5.545   | Yes          | ****    | <0.0001            |
| Hippocampus vs. Cerebellum     | 22.09      | 18.94 to 25.23     | Yes          | ****    | <0.0001            |
| Hippocampus vs. Hypothalamus   | 24.16      | 20.94 to 27.38     | Yes          | ****    | <0.0001            |
| Hippocampus vs. Pons           | 33.54      | 30.31 to 36.76     | Yes          | ****    | <0.0001            |
| Hippocampus vs. medulla        | 34.75      | 31.52 to 37.97     | Yes          | ****    | <0.0001            |
| Hippocampus vs. midbrain       | 29.17      | 25.95 to 32.40     | Yes          | ****    | <0.0001            |
| Hippocampus vs. olfactory bulb | 30.78      | 27.56 to 34.01     | Yes          | ****    | <0.0001            |

|                                  |       |                 |     |      |         |
|----------------------------------|-------|-----------------|-----|------|---------|
| Hippocampus vs. caudate putamen  | 32.66 | 29.44 to 35.89  | Yes | **** | <0.0001 |
| Hippocampus vs. basal forebrain  | 29.76 | 26.53 to 32.98  | Yes | **** | <0.0001 |
| Hippocampus vs. ventral striatum | 27.70 | 24.48 to 30.93  | Yes | **** | <0.0001 |
| Thalamus vs. Cerebellum          | 30.78 | 27.63 to 33.92  | Yes | **** | <0.0001 |
| Thalamus vs. Hypothalamus        | 32.85 | 29.63 to 36.07  | Yes | **** | <0.0001 |
| Thalamus vs. Pons                | 42.23 | 39.00 to 45.45  | Yes | **** | <0.0001 |
| Thalamus vs. medulla             | 43.44 | 40.21 to 46.66  | Yes | **** | <0.0001 |
| Thalamus vs. midbrain            | 37.86 | 34.64 to 41.09  | Yes | **** | <0.0001 |
| Thalamus vs. olfactory bulb      | 39.47 | 36.25 to 42.70  | Yes | **** | <0.0001 |
| Thalamus vs. caudate putamen     | 41.35 | 38.13 to 44.58  | Yes | **** | <0.0001 |
| Thalamus vs. basal forebrain     | 38.45 | 35.22 to 41.67  | Yes | **** | <0.0001 |
| Thalamus vs. ventral striatum    | 36.39 | 33.17 to 39.62  | Yes | **** | <0.0001 |
| Cerebellum vs. Hypothalamus      | 2.072 | -1.151 to 5.295 | No  | ns   | 0.5916  |
| Cerebellum vs. Pons              | 11.45 | 8.225 to 14.67  | Yes | **** | <0.0001 |
| Cerebellum vs. medulla           | 12.66 | 9.436 to 15.88  | Yes | **** | <0.0001 |
| Cerebellum vs. midbrain          | 7.086 | 3.862 to 10.31  | Yes | **** | <0.0001 |
| Cerebellum vs. olfactory bulb    | 8.697 | 5.473 to 11.92  | Yes | **** | <0.0001 |
| Cerebellum vs. caudate putamen   | 10.57 | 7.351 to 13.80  | Yes | **** | <0.0001 |
| Cerebellum vs. basal forebrain   | 7.670 | 4.446 to 10.89  | Yes | **** | <0.0001 |
| Cerebellum vs. ventral striatum  | 5.617 | 2.394 to 8.840  | Yes | **** | <0.0001 |
| Hypothalamus vs. Pons            | 9.376 | 6.077 to 12.68  | Yes | **** | <0.0001 |
| Hypothalamus vs. medulla         | 10.59 | 7.288 to 13.89  | Yes | **** | <0.0001 |
| Hypothalamus vs. midbrain        | 5.013 | 1.714 to 8.312  | Yes | **** | <0.0001 |

|                                     |         |                   |     |      |         |
|-------------------------------------|---------|-------------------|-----|------|---------|
| Hypothalamus vs. olfactory bulb     | 6.624   | 3.325 to 9.923    | Yes | **** | <0.0001 |
| Hypothalamus vs. caudate putamen    | 8.502   | 5.203 to 11.80    | Yes | **** | <0.0001 |
| Hypothalamus vs. basal forebrain    | 5.597   | 2.298 to 8.896    | Yes | **** | <0.0001 |
| Hypothalamus vs. ventral striatum   | 3.545   | 0.2460 to 6.844   | Yes | *    | 0.0238  |
| Pons vs. medulla                    | 1.211   | -2.088 to 4.510   | No  | ns   | 0.9858  |
| Pons vs. midbrain                   | -4.363  | -7.662 to -1.064  | Yes | **   | 0.0014  |
| Pons vs. olfactory bulb             | -2.752  | -6.051 to 0.5470  | No  | ns   | 0.2011  |
| Pons vs. caudate putamen            | -0.8740 | -4.173 to 2.425   | No  | ns   | 0.9992  |
| Pons vs. basal forebrain            | -3.779  | -7.078 to -0.4800 | Yes | *    | 0.0111  |
| Pons vs. ventral striatum           | -5.831  | -9.130 to -2.532  | Yes | **** | <0.0001 |
| medulla vs. midbrain                | -5.574  | -8.873 to -2.275  | Yes | **** | <0.0001 |
| medulla vs. olfactory bulb          | -3.963  | -7.262 to -0.6640 | Yes | **   | 0.0059  |
| medulla vs. caudate putamen         | -2.085  | -5.384 to 1.214   | No  | ns   | 0.6172  |
| medulla vs. basal forebrain         | -4.990  | -8.289 to -1.691  | Yes | ***  | 0.0001  |
| medulla vs. ventral striatum        | -7.042  | -10.34 to -3.743  | Yes | **** | <0.0001 |
| midbrain vs. olfactory bulb         | 1.611   | -1.688 to 4.910   | No  | ns   | 0.8943  |
| midbrain vs. caudate putamen        | 3.489   | 0.1900 to 6.788   | Yes | *    | 0.0284  |
| midbrain vs. basal forebrain        | 0.5840  | -2.715 to 3.883   | No  | ns   | >0.9999 |
| midbrain vs. ventral striatum       | -1.468  | -4.767 to 1.831   | No  | ns   | 0.9416  |
| olfactory bulb vs. caudate putamen  | 1.878   | -1.421 to 5.177   | No  | ns   | 0.7567  |
| olfactory bulb vs. basal forebrain  | -1.027  | -4.326 to 2.272   | No  | ns   | 0.9964  |
| olfactory bulb vs. ventral striatum | -3.079  | -6.378 to 0.2196  | No  | ns   | 0.0915  |
| caudate putamen vs. basal forebrain | -2.905  | -6.204 to 0.3940  | No  | ns   | 0.1416  |

|                                      |        |                  |     |     |        |
|--------------------------------------|--------|------------------|-----|-----|--------|
| caudate putamen vs. ventral striatum | -4.957 | -8.256 to -1.658 | Yes | *** | 0.0001 |
| basal forebrain vs. ventral striatum | -2.052 | -5.351 to 1.247  | No  | ns  | 0.6402 |

One-way ANOVA followed by Post-hoc-Tukey's multiple comparison test; *n* refers to the analysis of menin C-terminal epitope fluorescence intensity within whole brain slices, ROIs derived from 13 separate images from 7 independent experiments; \*  $p < 0.1$ , \*\*  $p < 0.01$ , \*\*\*  $p < 0.001$ , \*\*\*\*  $p < 0.0001$ , ns  $\geq 0.05$

**Supplementary Table S10b.** Related to Figure 6. IHC fluorescence of menin in Adult mouse brain slices.

| Fluorescence Intensity | Co     | Hc    | Th     | Ce     | Ht     |
|------------------------|--------|-------|--------|--------|--------|
| Mean                   | 32.83  | 48.43 | 57.12  | 26.34  | 24.27  |
| Std. Error of Mean     | 0.7364 | 1.121 | 0.6776 | 0.6695 | 0.4603 |

**Supplementary Table S11a.** Related to Figure 7. Mean comparison of degree of colocalization of PSD-95 with menin between different aged mouse brain slices.

| Ages          | Mean Diff. | 95.00% CI of diff.  | Significant? | Summary | Adjusted <i>p</i> Value |
|---------------|------------|---------------------|--------------|---------|-------------------------|
| E15 vs. E18   | -0.024     | -0.08336 to 0.03536 | No           | ns      | 0.6985                  |
| E15 vs. P10   | 0.168      | 0.1086 to 0.2274    | Yes          | ****    | <0.0001                 |
| E15 vs. Adult | -0.008     | -0.06736 to 0.05136 | No           | ns      | 0.9834                  |
| E18 vs. P10   | 0.192      | 0.1326 to 0.2514    | Yes          | ****    | <0.0001                 |
| E18 vs. Adult | 0.016      | -0.04336 to 0.07536 | No           | ns      | 0.8861                  |
| P10 vs. Adult | -0.176     | -0.2354 to -0.1166  | Yes          | ****    | <0.0001                 |

One-way ANOVA followed by Post-hoc-Tukey's multiple comparison test; *n* refers to the analysis of PSD-95 and menin D.O.C. within different aged whole brain slices, ROIs derived from 13 separate images from 7 independent experiments; \*\*\*\*  $p < 0.0001$ , ns  $\geq 0.05$

**Supplementary Table S11b.** Related to Figure 7. Mean of degree of colocalization of PSD-95 with menin in different aged mouse brain slices.

| Degree of colocalization | E15     | E18      | P10     | Adult   |
|--------------------------|---------|----------|---------|---------|
| Mean                     | 0.812   | 0.836    | 0.644   | 0.82    |
| Std. Error of Mean       | 0.01031 | 0.009684 | 0.02583 | 0.01022 |

**Supplementary Table S12a.** Related to Figure 7. Mean comparison of degree of colocalization of SYT with menin between different aged mouse brain slices.

| Ages          | Mean Diff. | 95.00% CI of diff.   | Significant? | Summary | Adjusted <i>P</i> Value |
|---------------|------------|----------------------|--------------|---------|-------------------------|
| E15 vs. E18   | -0.0558    | -0.08391 to -0.02769 | Yes          | ****    | <0.0001                 |
| E15 vs. P10   | 0.0742     | 0.04609 to 0.1023    | Yes          | ****    | <0.0001                 |
| E15 vs. Adult | -0.1608    | -0.1889 to -0.1327   | Yes          | ****    | <0.0001                 |
| E18 vs. P10   | 0.13       | 0.1019 to 0.1581     | Yes          | ****    | <0.0001                 |
| E18 vs. Adult | -0.105     | -0.1331 to -0.07689  | Yes          | ****    | <0.0001                 |
| P10 vs. Adult | -0.235     | -0.2631 to -0.2069   | Yes          | ****    | <0.0001                 |

One-way ANOVA followed by Post-hoc-Tukey's multiple comparison test; *n* refers to the analysis of SYT and menin D.O.C. within different aged whole brain slices, ROIs derived from 13 separate images from 7 independent experiments; \*\*\*\*  $p < 0.0001$

**Supplementary Table S12b.** Related to Figure 7. Mean of degree of colocalization of SYT with menin in different aged mouse brain slices.

| Degree of colocalization | E15      | E18      | P10      | Adult    |
|--------------------------|----------|----------|----------|----------|
| Mean                     | 0.7352   | 0.791    | 0.661    | 0.896    |
| Std. Error of Mean       | 0.006987 | 0.006046 | 0.006403 | 0.009568 |

**Supplementary Table S13a.** Related to Figure 8. Mean comparison of degree of colocalization of PSD-95 with menin between different Days in-vitro (DIV) in hippocampal neuronal cultures.

| DIV             | Mean Diff. | 95.00% CI of diff.  | Significant? | Summary | Adjusted Value | <i>p</i> |
|-----------------|------------|---------------------|--------------|---------|----------------|----------|
| DIV4 vs. DIV7   | 0.007778   | -0.05845 to 0.07401 | No           | ns      | 0.9886         |          |
| DIV4 vs. DIV10  | -0.01656   | -0.08279 to 0.04968 | No           | ns      | 0.9049         |          |
| DIV4 vs. DIV12  | -0.04422   | -0.1105 to 0.02201  | No           | ns      | 0.2878         |          |
| DIV7 vs. DIV10  | -0.02433   | -0.09056 to 0.04190 | No           | ns      | 0.7531         |          |
| DIV7 vs. DIV12  | -0.052     | -0.1182 to 0.01423  | No           | ns      | 0.1663         |          |
| DIV10 vs. DIV12 | -0.02767   | -0.09390 to 0.03856 | No           | ns      | 0.673          |          |

One-way ANOVA followed by Post-hoc-Tukey's multiple comparison test; *n* refers to the analysis of PSD-95 and menin D.O.C. within different Days in-vitro (DIV) in hippocampal neuronal cultures, ROIs derived from 18 separate images from 12 independent experiments; ns  $\geq 0.05$

**Supplementary Table S13b.** Related to Figure 8. Mean of degree of colocalization of PSD-95 with menin in Days in-vitro (DIV) in hippocampal neuronal cultures.

| Degree of colocalization | DIV4    | DIV7    | DIV10   | DIV12    |
|--------------------------|---------|---------|---------|----------|
| Mean                     | 0.8857  | 0.8779  | 0.9022  | 0.9299   |
| Std. Error of Mean       | 0.01658 | 0.02512 | 0.01543 | 0.007131 |

**Supplementary Table S14a.** Related to Figure 8. Mean comparison of degree of colocalization of SYT with menin between different Days in-vitro (DIV) in hippocampal neuronal cultures.

| DIV             | Mean Diff. | 95.00% CI of diff.  | Significant? | Summary | Adjusted Value | <i>p</i> |
|-----------------|------------|---------------------|--------------|---------|----------------|----------|
| DIV4 vs. DIV7   | 0.04113    | -0.03678 to 0.1190  | No           | ns      | 0.4852         |          |
| DIV4 vs. DIV10  | -0.07525   | -0.1532 to 0.002659 | No           | ns      | 0.0612         |          |
| DIV4 vs. DIV12  | -0.1363    | -0.2142 to -0.05834 | Yes          | ***     | 0.0003         |          |
| DIV7 vs. DIV10  | -0.1164    | -0.1943 to -0.03847 | Yes          | **      | 0.0018         |          |
| DIV7 vs. DIV12  | -0.1774    | -0.2553 to -0.09947 | Yes          | ****    | <0.0001        |          |
| DIV10 vs. DIV12 | -0.061     | -0.1389 to 0.01691  | No           | ns      | 0.166          |          |

One-way ANOVA followed by Post-hoc-Tukey's multiple comparison test; *n* refers to the analysis of SYT and menin D.O.C. within different Days in-vitro (DIV) in hippocampal neuronal cultures, ROIs derived from 18 separate images from 12 independent experiments; \*\*  $p < 0.01$ , \*\*\*  $p < 0.001$ , \*\*\*\*  $p < 0.0001$ , ns  $\geq 0.05$

**Supplementary Table S14b.** Related to Figure 8. Mean of degree of colocalization of SYT with menin in Days in-vitro (DIV) in hippocampal neuronal cultures.

| Degree of colocalization | DIV4    | DIV7    | DIV10    | DIV12    |
|--------------------------|---------|---------|----------|----------|
| Mean                     | 0.7878  | 0.7466  | 0.863    | 0.924    |
| Std. Error of Mean       | 0.03079 | 0.02226 | 0.009233 | 0.009979 |

**Supplementary Table S15.** Related to Figure 9. Mean of degree of colocalization of GABAB with menin in distinct regions of adult mouse brain.

| De                 | Co                | Hc                 | Th                | Ce                |
|--------------------|-------------------|--------------------|-------------------|-------------------|
| Mean               | 0.646             | 0.49               | 0.618             | 0.45              |
| Std. Error of Mean | 0.01648           | 0.02011            | 0.01896           | 0.01282           |
| Test Statistics    | t = 8.860, df = 9 | t = 0.4972, df = 9 | t = 6.223, df = 9 | t = 3.899, df = 9 |
| <i>p</i> Value     | <0.0001           | 0.6309             | 0.0002            | 0.0036            |
| Summary            | ****              | ns                 | ***               | **                |

One sample t-test; *n* refers to the analysis of GABA B and menin D.O.C. within distinct regions of adult mouse brain, ROIs derived from 14 separate images from 8 independent experiments; \*\*  $p < 0.01$ , \*\*\*  $p < 0.001$ , \*\*\*\*  $p < 0.0001$ , ns  $\geq 0.05$



**Supplementary Table S16.** Related to Figure 9. Mean of degree of colocalization of mGluR1 with menin in distinct regions of adult mouse brain.

| Degree of colocalization | Co                | Hc                | Th                | Ce                |
|--------------------------|-------------------|-------------------|-------------------|-------------------|
| Mean                     | 0.885             | 0.795             | 0.884             | 0.81              |
| Std. Error of Mean       | 0.01176           | 0.01204           | 0.01118           | 0.01135           |
| Test Statistics          | t = 24.50, df = 9 | t = 32.73, df = 9 | t = 34.36, df = 9 | t = 27.31, df = 9 |
| p Value                  | <0.0001           | <0.0001           | <0.0001           | <0.0001           |
| Summary                  | ****              | ****              | ****              | ****              |

One sample t-test; *n* refers to the analysis of GABA B and menin D.O.C. within distinct regions of adult mouse brain, ROIs derived from 14 separate images from 8 independent experiments; \*\*\*\* *p* < 0.0001

**Supplementary Table S17.** Related to Figure 9. Mean comparison of degree of colocalization of mGluR1 and GABAB with menin in distinct regions of adult mouse brain.

| Treatment | Mean Diff. | 95.00% CI of diff. | Significant? | Summary | Adjusted Value | <i>p</i> |
|-----------|------------|--------------------|--------------|---------|----------------|----------|
| Co        | -0.239     | -0.2922 to -0.1858 | Yes          | ****    | <0.0001        |          |
| Hc        | -0.305     | -0.3582 to -0.2518 | Yes          | ****    | <0.0001        |          |
| Th        | -0.266     | -0.3192 to -0.2128 | Yes          | ****    | <0.0001        |          |
| Ce        | -0.36      | -0.4132 to -0.3068 | Yes          | ****    | <0.0001        |          |

Two-way ANOVA followed by Sidak's multiple comparison test; *n* refers to the mean comparison of D.O.C. of mGluR1 of GABA B with menin within distinct regions of adult mouse brain, ROIs derived from 14 separate images from 8 independent experiments; \*\*\*\* *p* < 0.0001

**Supplementary Table S18a.** Related to Figure 9. Mean comparison of degree of colocalization of GABAA with menin between different aged mouse brain (temporal).

|                             | E12.5              | E15                | E18                 | P10                | Adult               |
|-----------------------------|--------------------|--------------------|---------------------|--------------------|---------------------|
| Actual mean                 | 0.7582             | 0.6555             | 0.5155              | 0.4700             | 0.9409              |
| One sample t test           |                    |                    |                     |                    |                     |
| t, df                       | t = 11.51, df = 10 | t = 4.008, df = 10 | t = 0.6602, df = 10 | t = 1.318, df = 10 | t = 0.8704, df = 10 |
| p value (two tailed)        | <0.0001            | 0.0025             | 0.5240              | 0.2169             | 0.4045              |
| p value summary             | ****               | **                 | ns                  | ns                 | ns                  |
| Significant (alpha = 0.05)? | Yes                | Yes                | No                  | No                 | No                  |

One sample t-test; *n* refers to the analysis of GABA A and menin D.O.C. between different ages of mouse brain, ROIs derived from 14 separate images from 13 independent experiments; \*\* *p* < 0.01, \*\*\*\* *p* < 0.0001, ns ≥ 0.05

**Supplementary Table S18b.** Related to Figure 7. Mean comparison of degree of colocalization of GABAB with menin between different aged mouse brain (temporal).

|                             | E12.5              | E15                | E18                  | P10                 | Adult               |
|-----------------------------|--------------------|--------------------|----------------------|---------------------|---------------------|
| Actual mean                 | 0.7691             | 0.7560             | 0.5015               | 0.4907              | 0.4686              |
| One sample t test           |                    |                    |                      |                     |                     |
| t, df                       | t = 9.002, df = 10 | t = 10.64, df = 10 | t = 0.05729, df = 10 | t = 0.4312, df = 10 | t = 0.8284, df = 10 |
| p value (two tailed)        | <0.0001            | <0.0001            | 0.9554               | 0.6755              | 0.4268              |
| p value summary             | ****               | ****               | ns                   | ns                  | ns                  |
| Significant (alpha = 0.05)? | Yes                | Yes                | No                   | No                  | No                  |

One sample t-test; *n* refers to the analysis of GABA B and menin D.O.C. between different ages of mouse brain, ROIs derived from 14 separate images from 13 independent experiments; \*\*\*\* *p* < 0.0001, ns ≥ 0.05

**Supplementary Table S18c.** Related to Figure 7. Mean comparison of degree of colocalization of mGluR1 with menin between different aged mouse brain (temporal).

|                                    | E12.5            | E15                | E18                | P10                | Adult              |
|------------------------------------|------------------|--------------------|--------------------|--------------------|--------------------|
| <b>Actual mean</b>                 | 0.3665           | 0.5797             | 0.6801             | 0.8008             | 0.8643             |
| <b>One sample t test</b>           |                  |                    |                    |                    |                    |
| <b>t, df</b>                       | t = 2.891, df=10 | t = 3.468, df = 10 | t = 5.379, df = 10 | t = 9.550, df = 10 | t = 12.57, df = 10 |
| <b>p value (two tailed)</b>        | 0.0161           | 0.0060             | 0.0003             | <0.0001            | <0.0001            |
| <b>p value summary</b>             | *                | **                 | ***                | ****               | ****               |
| <b>Significant (alpha = 0.05)?</b> | Yes              | Yes                | Yes                | Yes                | Yes                |

One sample t-test; *n* refers to the analysis of mGluR1 and menin D.O.C. between different ages of mouse brain, ROIs derived from 14 separate images from 13 independent experiments; \*  $p < 0.1$ , \*\*  $p < 0.01$ , \*\*\*  $p < 0.001$ , \*\*\*\*  $p < 0.0001$

**Supplementary Table S18d.** Related to Figure 7. Mean comparison of degree of colocalization of GluR1 with menin between different aged mouse brain (temporal).

|                                    | E12.5             | E15                | E18               | P10               | Adult             |
|------------------------------------|-------------------|--------------------|-------------------|-------------------|-------------------|
| <b>Actual mean</b>                 | 0.3773            | 0.4970             | 0.6450            | 0.8233            | 0.9050            |
| <b>One sample t test</b>           |                   |                    |                   |                   |                   |
| <b>t, df</b>                       | t = 5.277, df = 9 | t = 0.1103, df = 9 | t = 5.564, df = 9 | t = 11.90, df = 9 | t = 13.68, df = 9 |
| <b>p value (two tailed)</b>        | 0.0005            | 0.9146             | 0.0004            | <0.0001           | <0.0001           |
| <b>p value summary</b>             | ***               | ns                 | ***               | ****              | ****              |
| <b>Significant (alpha = 0.05)?</b> | Yes               | No                 | Yes               | Yes               | Yes               |

One sample t-test; *n* refers to the analysis of GluR1 and menin D.O.C. between different ages of mouse brain, ROIs derived from 14 separate images from 13 independent experiments; \*\*\*  $p < 0.001$ , \*\*\*\*  $p < 0.0001$ , ns  $\geq 0.05$

**Supplementary Table S18e.** Related to Figure 7. Mean comparison of degree of colocalization of GABAB, GABAA, mGluR1 and GluR1 with menin between different aged mouse brain (temporal).

| Tukey's multiple comparisons test | 95.00% CI of diff.  | Significant? | Summary | Adjusted <i>p</i> Value | q     | df    |
|-----------------------------------|---------------------|--------------|---------|-------------------------|-------|-------|
| <b>E12.5</b>                      |                     |              |         |                         |       |       |
| GABA A vs. GluR1                  | 0.2715 to 0.4903    | Yes          | ****    | <0.0001                 | 12.76 | 195.0 |
| GABA B vs. mGluR1                 | 0.2959 to 0.5094    | Yes          | ****    | <0.0001                 | 13.82 | 195.0 |
| <b>E15</b>                        |                     |              |         |                         |       |       |
| GABA A vs. GluR1                  | 0.04900 to 0.2678   | Yes          | **      | 0.0013                  | 5.306 | 195.0 |
| GABA B vs. mGluR1                 | 0.06949 to 0.2831   | Yes          | ***     | 0.0002                  | 6.050 | 195.0 |
| <b>E18</b>                        |                     |              |         |                         |       |       |
| GABA A vs. GluR1                  | -0.2389 to -0.02009 | Yes          | *       | 0.0131                  | 4.338 | 195.0 |
| GABA B vs. mGluR1                 | -0.2853 to -0.07179 | Yes          | ***     | 0.0001                  | 6.129 | 195.0 |
| <b>P10</b>                        |                     |              |         |                         |       |       |
| GABA A vs. GluR1                  | -0.4627 to -0.2439  | Yes          | ****    | <0.0001                 | 11.83 | 195.0 |

|                   |                    |     |      |         |       |       |
|-------------------|--------------------|-----|------|---------|-------|-------|
| GABA B vs. mGluR1 | -0.4169 to -0.2033 | Yes | **** | <0.0001 | 10.64 | 195.0 |
| <b>Adult</b>      |                    |     |      |         |       |       |
| GABA A vs. GluR1  | -0.5644 to -0.3456 | Yes | **** | <0.0001 | 15.24 | 195.0 |
| GABA B vs. mGluR1 | -0.5025 to -0.2889 | Yes | **** | <0.0001 | 13.58 | 195.0 |

One-way ANOVA followed by Post-hoc-Tukey's multiple comparison test; *n* refers to the analysis of GABAA, GABAB, mGluR1, GluR1 and menin D.O.C. within different aged whole brain slices, ROIs derived from 14 separate images from 13 independent experiments; \* *p* < 0.1, \*\* *p* < 0.01, \*\*\* *p* < 0.001, \*\*\*\* *p* < 0.0001

**Supplementary Table S19a.** Related to Figure 9. Mean of degree of colocalization of  $\alpha 7$  nAChRs with menin in distinct regions of adult mouse brain.

| Degree of colocalization | Co                | Hc                | Th                | Ce                |
|--------------------------|-------------------|-------------------|-------------------|-------------------|
| Mean                     | 0.861             | 0.914             | 0.868             | 0.856             |
| Std. Error of Mean       | 0.013699          | 0.004             | 0.021695          | 0.01376           |
| Test Statistics          | t = 103.5, df = 9 | t = 26.35, df = 9 | t = 16.96, df = 9 | t = 25.87, df = 9 |
| <i>p</i> Value           | <0.0001           | <0.0001           | <0.0001           | <0.0001           |
| Summary                  | ****              | ****              | ****              | ****              |

One sample t-test; *n* refers to the analysis of  $\alpha 7$  nAChRs and menin D.O.C. within distinct regions of adult mouse brain, ROIs derived from 15 separate images from 6 independent experiments; \*\*\*\* *p* < 0.0001

**Supplementary Table S19b.** Related to Figure 9. Mean of degree of colocalization of  $\alpha 5$  nAChRs with menin in distinct regions of adult mouse brain.

| Degree of colocalization | Co                | Hc                | Th                | Ce                |
|--------------------------|-------------------|-------------------|-------------------|-------------------|
| Mean                     | 0.857             | 0.888             | 0.8992            | 0.873             |
| Std. Error of Mean       | 0.024224          | 0.013317          | 0.015003          | 0.010651          |
| Test Statistics          | t = 29.14, df = 9 | t = 14.74, df = 9 | t = 26.61, df = 9 | t = 35.02, df = 9 |
| <i>p</i> Value           | <0.0001           | <0.0001           | <0.0001           | <0.0001           |
| Summary                  | ****              | ****              | ****              | ****              |

One sample t-test; *n* refers to the analysis of  $\alpha 5$  nAChRs and menin D.O.C. within distinct regions of adult mouse brain, ROIs derived from 15 separate images from 9 independent experiments; \*\*\*\* *p* < 0.0001

**Supplementary Table S19c.** Related to Figure 9. Mean of degree of colocalization of  $\alpha 7$  nAChRs with menin in different ages of whole mouse brain slices.

| Degree colocalization | E15      | E18      | P10     | Adult   |
|-----------------------|----------|----------|---------|---------|
| Mean                  | 0.7663   | 0.8492   | 0.8685  | 0.9143  |
| Std. Error of Mean    | 0.007174 | 0.006198 | 0.01425 | 0.01108 |

**Supplementary Table S19d.** Related to Figure 9. Mean comparison of degree of colocalization of  $\alpha 7$  nAChRs with menin between different aged mouse brain slices (temporal).

| Ages          | Mean Diff. | 95.00% CI of diff.    | Significant? | Summary | Adjusted Value <i>p</i> |
|---------------|------------|-----------------------|--------------|---------|-------------------------|
| E15 vs. E18   | -0.0829    | -0.1217 to -0.04407   | Yes          | ****    | <0.0001                 |
| E15 vs. P10   | -0.1022    | -0.1410 to -0.06333   | Yes          | ****    | <0.0001                 |
| E15 vs. Adult | -0.148     | -0.1868 to -0.1092    | Yes          | ****    | <0.0001                 |
| E18 vs. P10   | -0.01926   | -0.05809 to 0.01957   | No           | ns      | 0.5467                  |
| E18 vs. Adult | -0.0651    | -0.1039 to -0.02627   | Yes          | ***     | 0.0004                  |
| P10 vs. Adult | -0.04584   | -0.08467 to -0.007013 | Yes          | *       | 0.0153                  |

One-way ANOVA followed by Post-hoc-Tukey's multiple comparison test; *n* refers to the analysis of  $\alpha 7$  nAChRs and menin D.O.C. within different aged whole brain slices, ROIs derived from 15 separate images from 9 independent experiments; \* *p* < 0.1, \*\*\* *p* < 0.001, \*\*\*\* *p* < 0.0001, ns  $\geq 0.05$

**Supplementary Table S19e.** Related to Figure 9. Mean of degree of colocalization of  $\alpha 5$  nAChRs with menin in different ages of whole mouse brain slices.

| Fluorescence Intensity | E15     | E18     | P10      | Adult    |
|------------------------|---------|---------|----------|----------|
| Mean                   | 0.832   | 0.8818  | 0.9288   | 0.9343   |
| Std. Error of Mean     | 0.00611 | 0.00627 | 0.004765 | 0.007059 |

**Supplementary Table S19f.** Related to Figure 9. Mean comparison of degree of colocalization of  $\alpha 5$  nAChRs with menin between different aged mouse brain slices (temporal).

| Ages          | Mean Diff. | 95.00% CI of diff.   | Significant? | Summary | Adjusted <i>p</i> Value |
|---------------|------------|----------------------|--------------|---------|-------------------------|
| E15 vs. E18   | -0.0498    | -0.07306 to -0.02654 | Yes          | ****    | <0.0001                 |
| E15 vs. P10   | -0.0968    | -0.1201 to -0.07354  | Yes          | ****    | <0.0001                 |
| E15 vs. Adult | -0.1023    | -0.1256 to -0.07904  | Yes          | ****    | <0.0001                 |
| E18 vs. P10   | -0.047     | -0.07026 to -0.02374 | Yes          | ****    | <0.0001                 |
| E18 vs. Adult | -0.0525    | -0.07576 to -0.02924 | Yes          | ****    | <0.0001                 |
| P10 vs. Adult | -0.0055    | -0.02876 to 0.01776  | No           | ns      | 0.9194                  |

One-way ANOVA followed by Post-hoc-Tukey's multiple comparison test; *n* refers to the analysis of  $\alpha 7$  nAChRs and menin D.O.C. within different aged whole brain slices, ROIs derived from 15 separate images from 9 independent experiments; \*\*\*\*  $p < 0.0001$ , ns  $\geq 0.05$

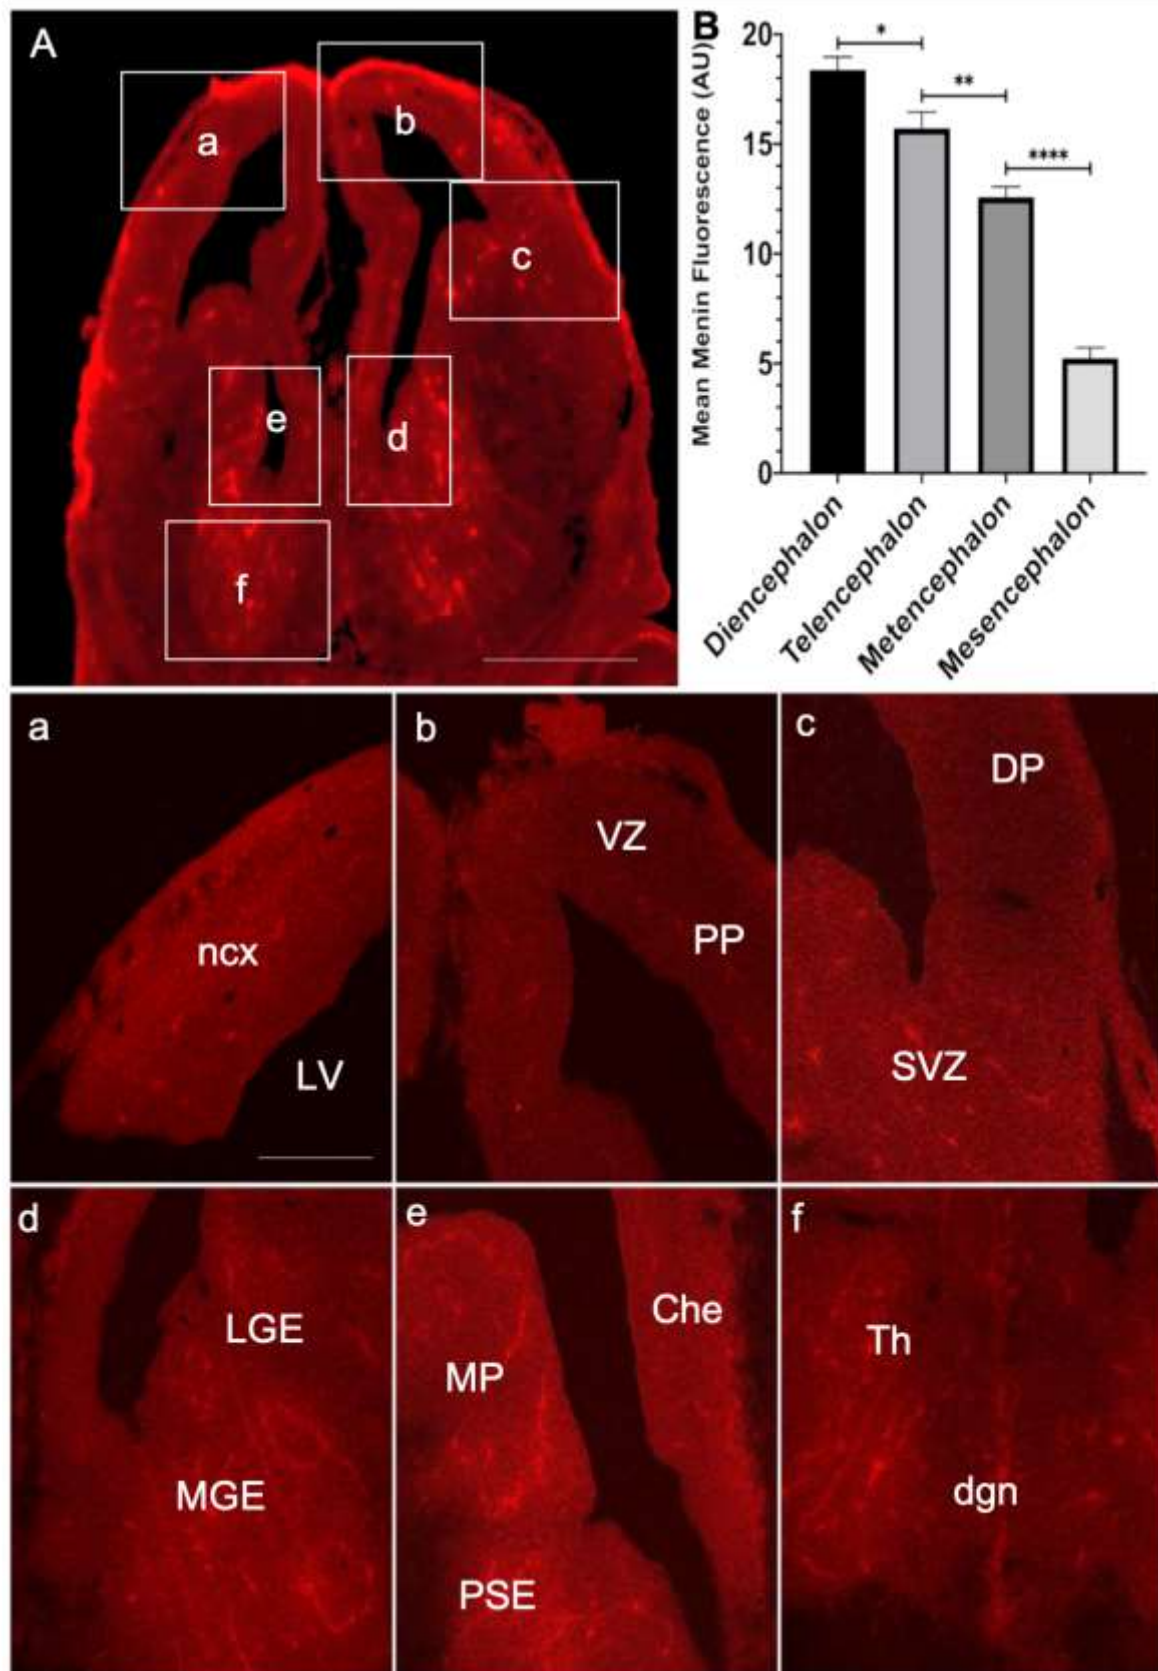

**Supplementary Figure S1.** Related to Figure 5. Menin protein expression in E12.5 embryonic mouse brain. (A). Menin protein distribution is represented on coronal sections in a rostro-caudal sequence (panels a–f). IHC characterization of menin protein at E12.5 shows high localization in the telencephalon especially in lateral and medial ganglionic eminence (panels d) in the neocortex (panel a) and in the subventricular zone (panel c). The ventral thalamus (panel e and f) and hypothalamus (panel c) showed strongest immunoreactivity with menin protein. Arrowheads indicate high localization of menin protein. Scale bar: (A) 250  $\mu$ m, panels a–f 100  $\mu$ m (B). Summary data, normalized fluorescence intensity of  $\alpha$ -C-

terminal menin in different regions of E12.5 mouse brain (ROIs: n = 13 each from seven independent samples; see Table S1a and S1b). Asterisks, statistical significance (One-way ANOVA followed by post-hoc tukey test); \*  $p < 0.05$ . \*\*  $p < 0.01$ . \*\*\*  $p < 0.0001$ . **Abbreviations:** ncx: neocortex, LV: Lateral ventricle, VZ: ventral zone, PP: preplate, DP: dorsal plate, SVZ: subventricular zone, LGE: lateral ganglionic eminence, MGE: medial ganglionic eminence, MP: medioposterior nucleus, Che: choroid plexus, PSE: paraseptal subpallial sector, Th: thalamus, dgn: Dentate gyrus neuroepithelium.

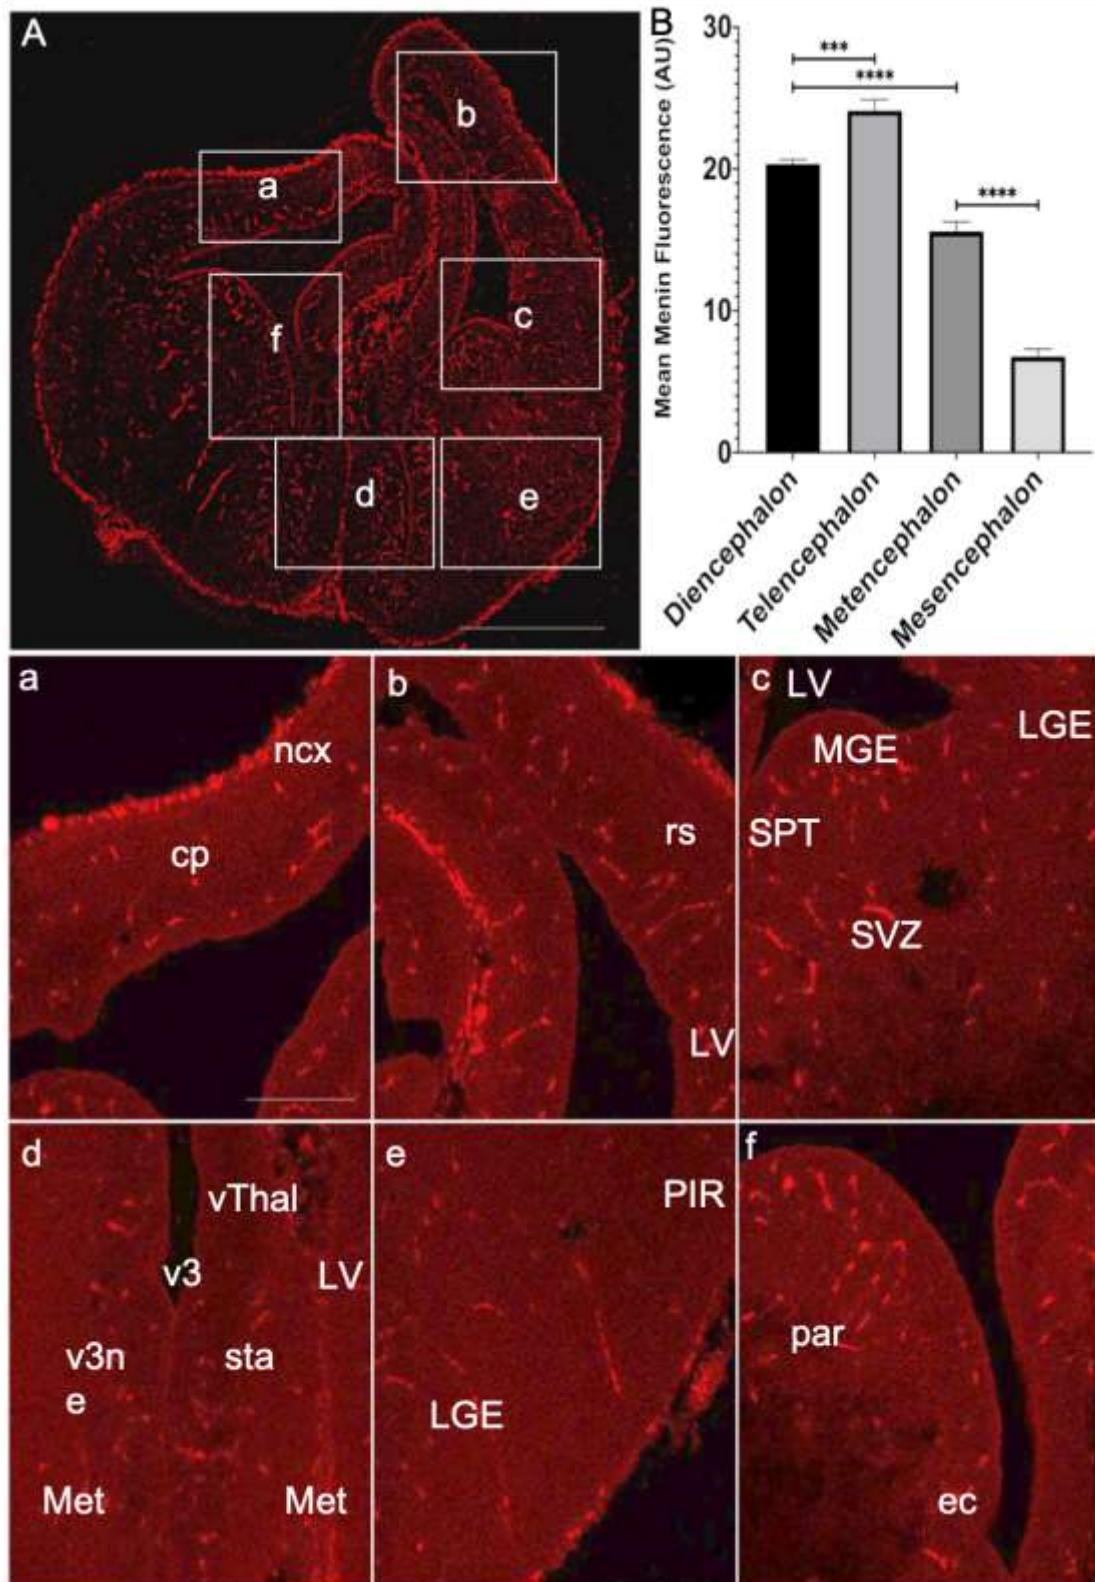

**Supplementary Figure S2.** Related to Figure 5. Menin protein expression in E15.5 embryonic mouse brain. (A). Menin protein distribution is represented on coronal sections in a rostro-caudal sequence (panels a–f). IHC characterization of menin protein at E15.5 displays highest localization in the telencephalic structures specifically in neocortex, retro-splenial



cortex, lateral ventricle (panel **a,b**) whereas moderate to low menin expression in septum, subventricular zone, external capsule and parietal cortex (panel **c,e**). The ventral thalamus, regions around the third ventricle, subthalamic area (panel **d**) also showed strong immunoreactivity with menin protein. Arrowheads indicate high localization of menin protein. Scale bar: (A) 250  $\mu$ m, panels (a–f) 100  $\mu$ m (B). Summary data, normalized fluorescence intensity of  $\alpha$ -C-terminal menin in different regions of E15.5 mouse brain (ROIs: n = 13 each from seven independent samples; see Table S2a and S2b). Asterisks, statistical significance (One-way ANOVA followed by post-hoc tukey test); \*\*\*  $p < 0.001$ . \*\*\*\*  $p < 0.0001$ . **Abbreviations:** ncx: neocortex, Cp: cortical plate, rs: retrosplenial cortex, LV: Lateral ventricle, VZ: ventral zone, SVZ: subventricular zone, LGE: lateral ganglionic eminence, MGE: medial ganglionic eminence, SPT: septum, v3: third ventricle, V3ne: third ventricle neuroepithelium, sta: striatum, Met: mesencephalic tegmentum, PIR: piriform cortex, par: Parietal cortex, ec: External capsule, vThal: ventral thalamus.

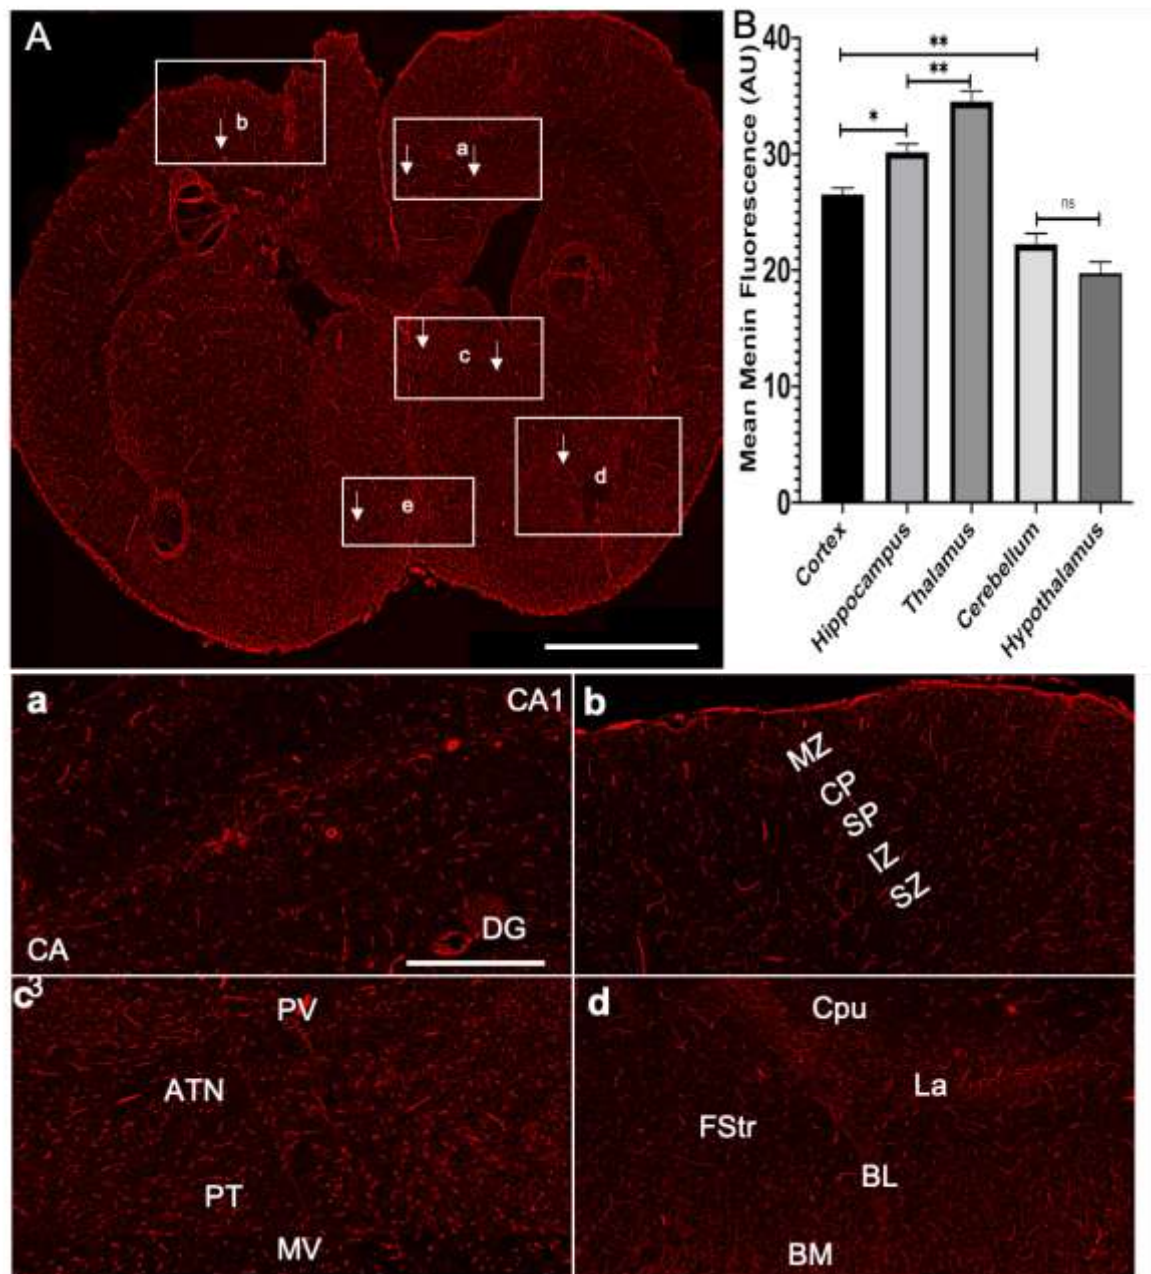

**Supplementary Figure S3.** Related to Figure 5. Menin protein expression in E18 embryonic mouse brain. (Aa–e). Menin protein distribution is represented on coronal sections in a rostro-caudal sequence (panels a–d). IHC characterization of menin protein at E18 demonstrates high localization in the telencephalon, hippocampus and cortex exhibited significantly robust localization of menin protein, with highest expression being in the dentate gyrus and CA1 regions of the hippocampus (panel a), in neocortex, frontal cortex, cingulate cortex (panel b) and moderate expression in parietal cortex and insular cortex (panel d). Within the diencephalon and thalamus exhibiting strong and ubiquitous signal, specifically in the nuclei of dorsal and ventral thalamic regions (panel c). Scale bar: (A) 300  $\mu$ m, panels (a–d) 150  $\mu$ m (B). Summary data, normalized fluorescence intensity of  $\alpha$ -C-terminal menin in different regions of E12.5 mouse brain (ROIs: n = 13 each from

seven independent samples; see Table S3a and S3b). Asterisks, statistical significance (One-way ANOVA followed by post-hoc tukey test); \*  $p < 0.05$ . \*\*  $p < 0.01$ , ns  $p > 0.05$ . **Abbreviations:** CA1: Cornu Ammonis-1, CA3 Cornu Ammonis-3, DG: Dentate gyrus, MZ: marginal zone, CP: cortical plate, SP: Subplate, IZ: Intermediate zone, SZ: subventricular zone, PV: paraventricular, ATN: anterior thalamic nuclei, PT: pretectum, MV: medioventral, Cpu: Caudate putamen, La: Lateral nucleus of amygdala, BL: Basolateral amygdaloid nucleus, FStr: Fundus Striati, BM: Basomedial amygdaloid nucleus.

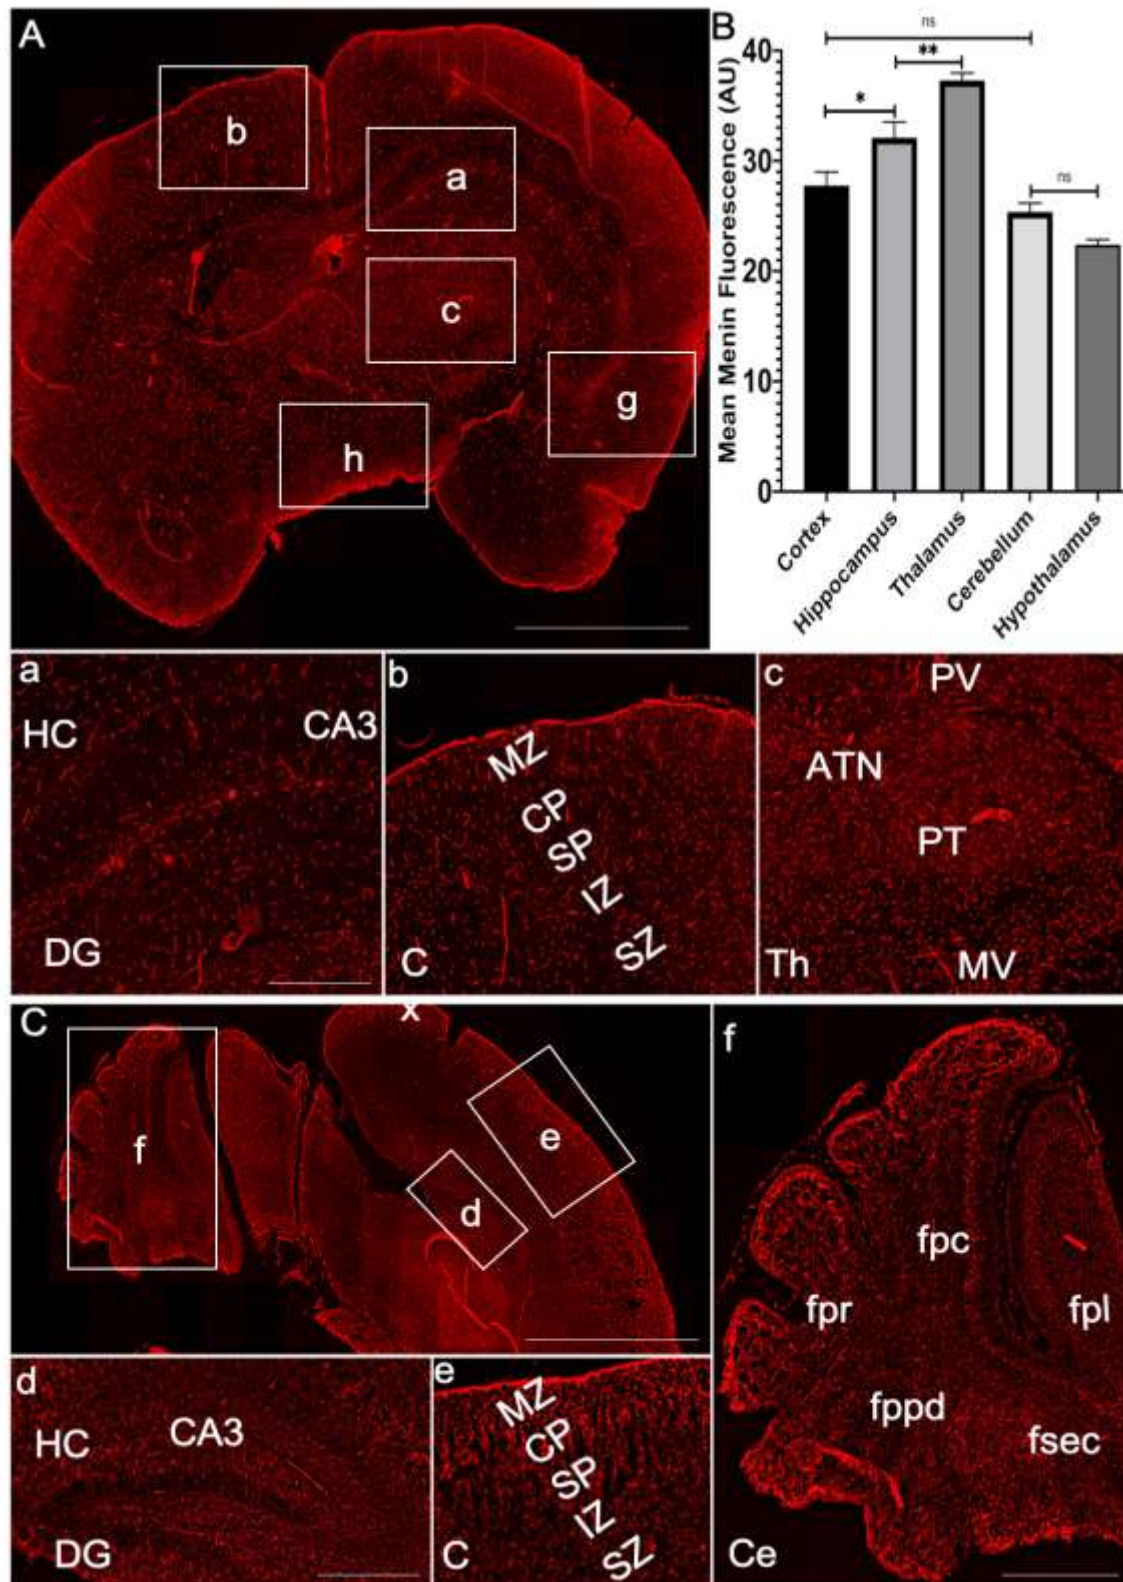

**Supplementary Figure S4.** Related to Figure 5. Menin protein expression in P10 mouse brain. (A,B). Menin protein distribution is represented on coronal sections in a rostro-caudal sequence (panels a–c,g,h) and on a sagittal section (panels d,e,f). IHC characterization of menin protein at P10 shows high localization in the telencephalon especially strong



expression in the dentate gyrus, CA1 and CA3 regions in hippocampus (panel **a,d**), in neocortex, frontal cortex, cingulate cortex, subventricular zone (panel **b,e**) and low expression in parietal cortex and insular cortex (panel **g**). Within the diencephalon, high localization in nuclei of dorsal, central and ventral thalamic regions (panel **c**). Whereas moderate menin fluorescence intensity was observed in hypothalamus (panel **h**). Within the metencephalon, cerebellum displayed strong fluorescence signal in the p10 mouse brain (panel **f**). Scale bar: (A).350  $\mu$ m, panels (a–c) 75  $\mu$ m, panel (d) 70  $\mu$ m, panel (e) 65  $\mu$ m, panels (f) 100  $\mu$ m (B) 300  $\mu$ m.(C). Summary data, normalized fluorescence intensity of  $\alpha$ -C-terminal menin in different regions of P10 mouse brain (ROIs: n = 13 each from seven independent samples; see Table S4a and S4b). Asterisks, statistical significance (One-way ANOVA followed by post-hoc tukey test); \*  $p < 0.05$ . \*\*  $p < 0.01$ , ns > 0.05 **Abbreviations:** HC: hippocampus, CA1: Cornu Ammonis-1, CA3 Cornu Ammonis-3, DG: Dentate gyrus, C: cortex, MZ: marginal zone, CP: cortical plate, SP: Subplate, IZ: Intermediate zone, SZ: subventricular zone, PV: paraventricular, Th: thalamus, ATN: anterior thalamic nuclei, PT: pretectum, MV: medioventral, Cpu: Caudate putamen, La: Lateral nucleus of amygdala, BL: Basolateral amygdaloid nucleus, Ce, cerebellum, FSec: secondary fissure; Fpl: posterolateral fissure, fppd: prepyramidal fissure, fpc: preculminate fissure.

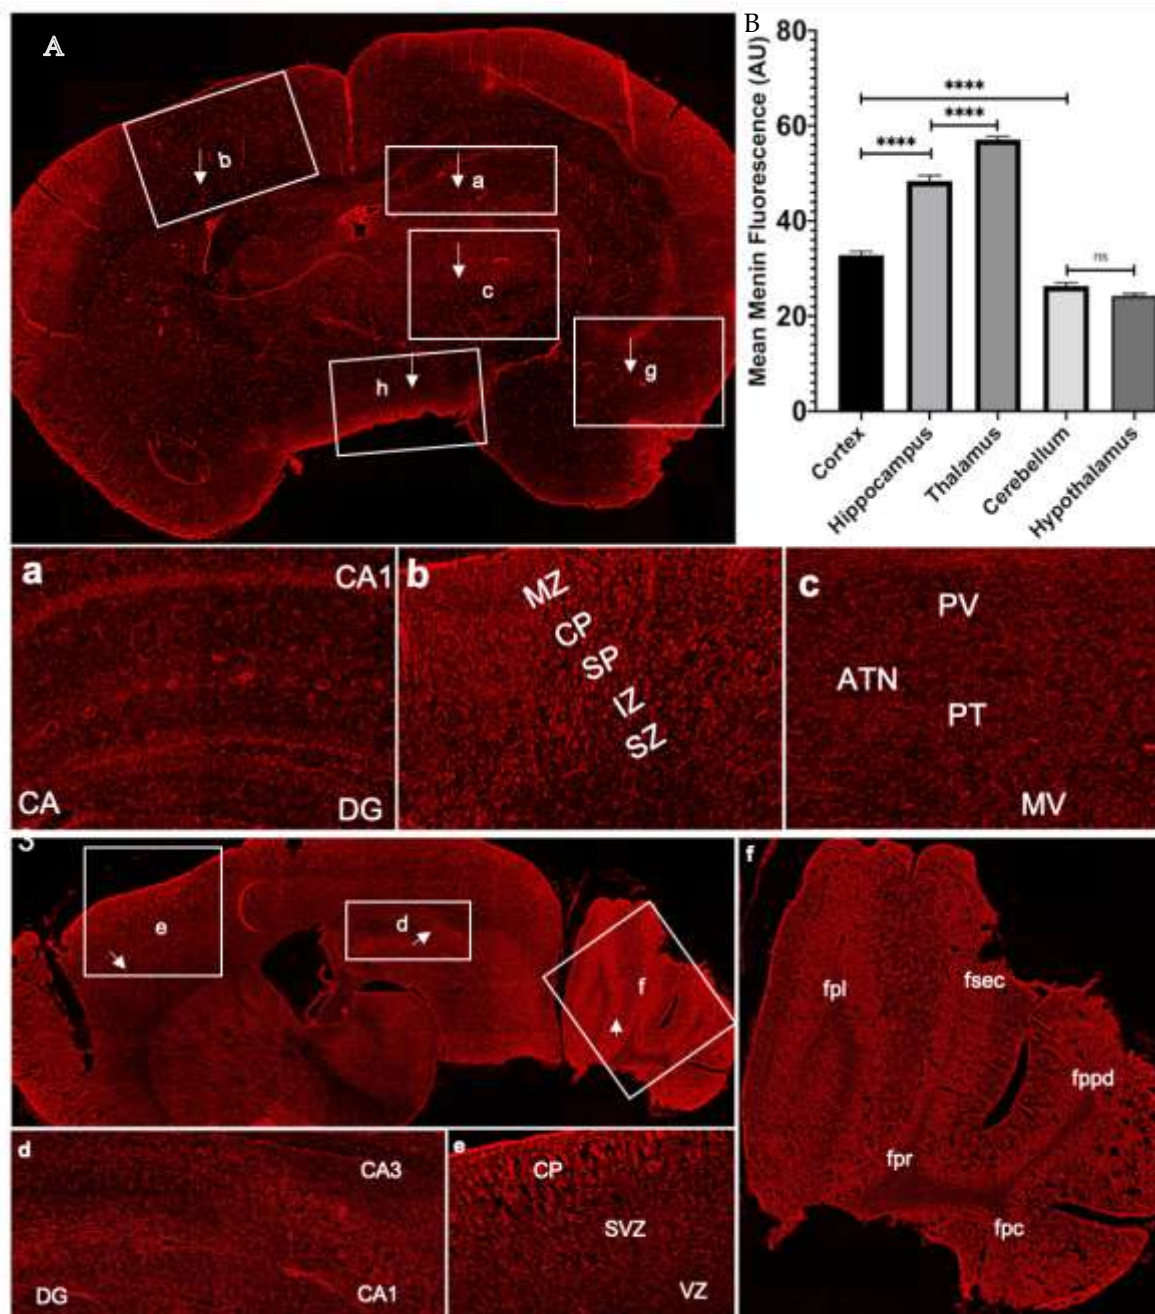

**Supplementary Figure S5.** Related to Figure 5. Menin protein expression in an adult mouse brain. (A,B). Menin protein distribution is represented on coronal sections in a rostro-caudal sequence (panels **a–c,g,h**) and on a sagittal section (panels **d,e,f**). IHC characterization of menin protein in an adult mouse brain slice exhibits high localization in the telencephalon especially in in dentate gyrus, CA1, CA2 and CA3 regions in hippocampus (panel **a,d**), in neocortex, frontal cortex,

cingulate cortex, subventricular zone (panel **b,e**) and low localization in parietal cortex and insular cortex (panel **g**). Within the diencephalon, high localization in nuclei of dorsal, central and ventral thalamic regions (panel **c**), whereby moderate expression was observed in the hypothalamus region (panel **h**). Within the metencephalon, cerebellum exhibited high menin fluorescence intensity in the adult mouse brain (panel **f**). Scale bar: (A).350  $\mu$ m, panels (a–c) 75  $\mu$ m, panel (d) 70  $\mu$ m, panel (e) 65  $\mu$ m, panels (f) 100  $\mu$ m (B) 300  $\mu$ m. (B). Summary data, normalized fluorescence intensity of  $\alpha$ -C-terminal menin in different regions of adult mouse brain (ROIs: n=13 each from 7 independent samples; see Supplementary Table S51a,b). Asterisks, statistical significance (One-way ANOVA followed by post-hoc tukey test);. \*\*\*\*  $p < 0.0001$ , ns  $>0.05$  **Abbreviations:** HC: hippocampus, CA1: Cornu Ammonis-1, CA3: Cornu Ammonis-3, DG: Dentate gyru, C:cortex, MZ: marginal zone, CP: cortical plate, SP: Subplate, IZ: Intermediate zone, SZ: subventricular zone, PV: paraventricular, Th:thalamus,ATN: anterior thalamic nuclei,PT: pretectum,MV: medioventral,Cpu: Caudate putamen,La: Lateral nucleus of amygdala, BL: Basolateral amygdaloid nucleus, Ce cerebellum, FSec: secondary fissure, Fpl: posterolateral fissure, fppd: prepyramidal fissure, fpc: preculminate fissure.

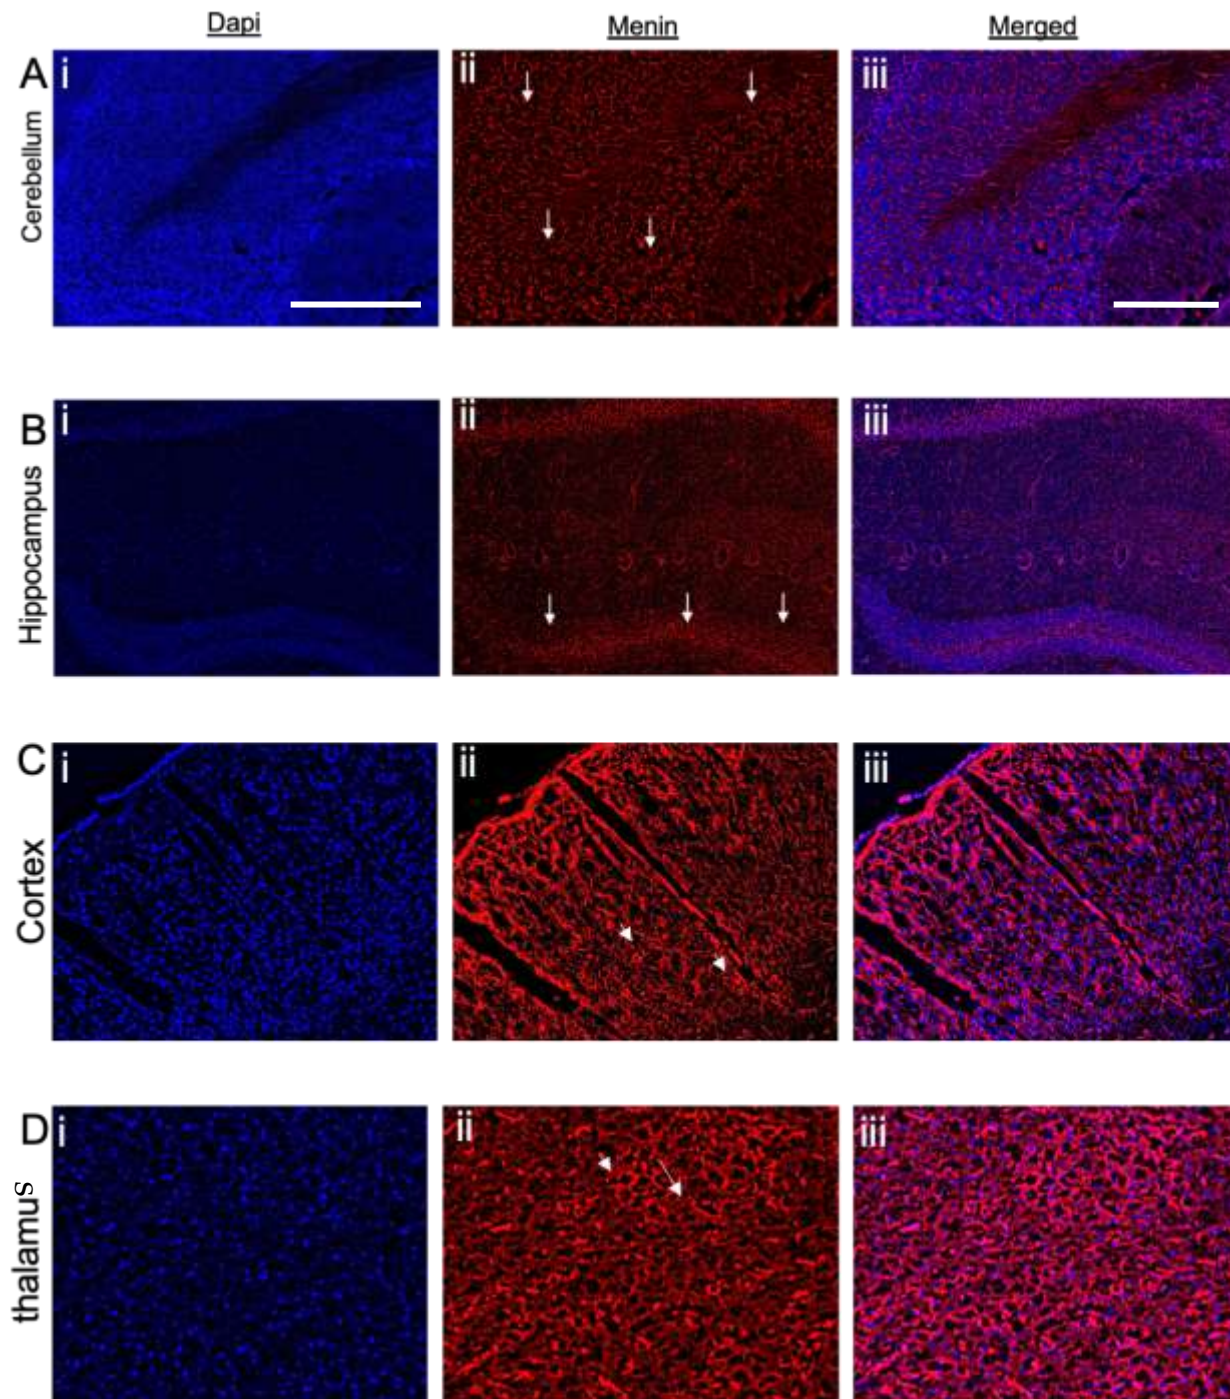

**Supplementary Figure S6.** Related to Figure 6. Menin exhibits neuron-specific expression in specific regions of brain. (Ai–Diii). IHC localization of menin in cerebellum, hippocampus, cortex and thalamus brain slice of adult mouse brain



(representative images). (A–Di). Slices labeled with DAPI for nuclear stain (A–Dii). Slices labeled with C-terminal epitope menin antibody. (A–Diii). Slice shows merged channels C-terminal menin with the nuclear stain DAPI. (n=24 images, 5 independent samples). Asterisks represent  $\alpha$ -C-menin's distinct localization in cytoplasm also punctuate localization along neurites indicated by arrowheads. Scale bars A–Di,ii: 75 $\mu$ m, A–Diii:100  $\mu$ m.

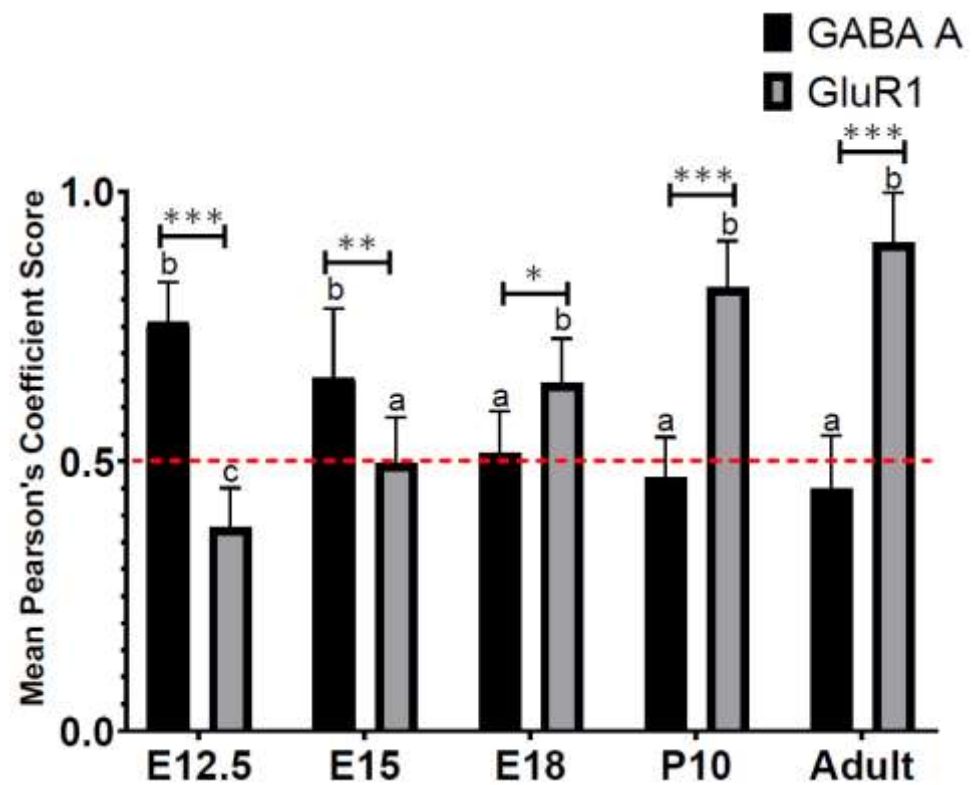

**Supplementary Figure S7.** Related to Figures 9. Summary data, Pearson's co-efficient, temporal pattern degree of colocalization of GABA A and GluR1 puncta with C-menin in E12.5, E15.5, E18, P10 and adult mouse brain mouse brain. Red dotted line indicates the literature value of significant DOC; group a (DOC significant precisely at 0.5), b (DOC significant) and group c (no significant DOC) (One sample t-test). Asterisks, statistical significance (One-way ANOVA followed by Sidak's comparison test); \*  $p < 0.1$ . \*\*  $p < 0.01$ . \*\*\*  $p < 0.001$ .
